# Supplementary material
Source: publisher figshare collection journal article supplement (https://acs.figshare.com/ndownloader/files/4675951)
Supplement: Supplementary file 1 [file 4675951]

## Supporting Information

**Title:** Molecularly Non-stoichiometric Crystals in Phosphorus Compounds

**Authors:** Manab Chakravarty, R. Rama Suresh and K. C. Kumara Swamy\*

|    |                                                                                         |           |
|----|-----------------------------------------------------------------------------------------|-----------|
| 1  | <b>Figure S1.</b> ORTEP diagram for <b>11</b>                                           | <b>S2</b> |
| 2  | <b>Figure S2.</b> ORTEP diagram for <b>[11+13]</b>                                      | <b>S2</b> |
| 3  | <b>Figure S3.</b> ORTEP diagram for <b>14</b>                                           | <b>S2</b> |
| 4  | <b>Figure S4.</b> ORTEP diagram for <b>15</b>                                           | <b>S3</b> |
| 5  | <b>Figure S5.</b> ORTEP diagram for <b>12</b>                                           | <b>S3</b> |
| 6  | <b>Figure S6.</b> ORTEP diagram for <b>16</b>                                           | <b>S3</b> |
| 7  | <b>Figure S7.</b> ORTEP diagram for <b>[16+17]a</b>                                     | <b>S4</b> |
| 8  | <b>Figure S8.</b> ORTEP diagram for <b>[16+17]b</b>                                     | <b>S4</b> |
| 9  | <b>Figure S9.</b> ORTEP diagram for <b>[16+17]c</b>                                     | <b>S4</b> |
| 10 | <b>Figure S10.</b> Packing diagram for <b>12</b>                                        | <b>S5</b> |
| 11 | <b>Figure S11.</b> Packing diagram for <b>16</b>                                        | <b>S5</b> |
| 12 | <b>Figure S12.</b> Packing diagram for <b>[16+17]a</b>                                  | <b>S6</b> |
| 13 | <b>Figure S13.</b> Packing diagram for <b>[16+17]b</b>                                  | <b>S6</b> |
| 14 | <b>Figure S14.</b> Packing diagram for <b>[16+17]c</b>                                  | <b>S7</b> |
| 15 | <b>Figure S15.</b> PLATON drawing of packing in <b>13</b> (left) and <b>14</b> (right). | <b>S7</b> |

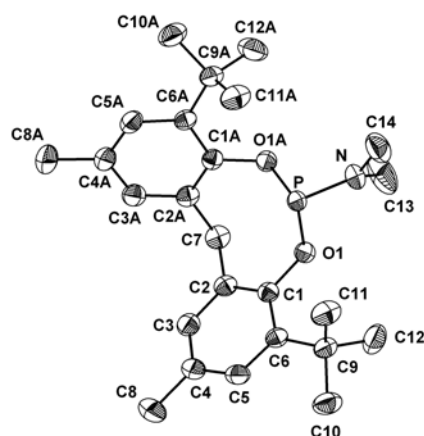

**Figure S1.** An ORTEP drawing of **11** (Hydrogen atoms are omitted for clarity).

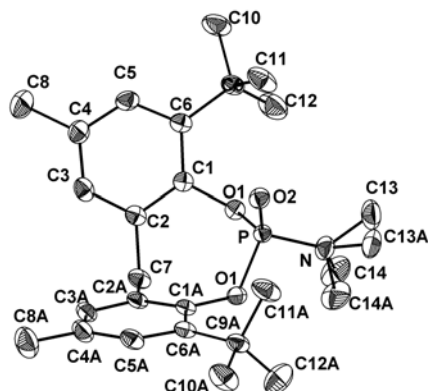

**Figure S2.** An ORTEP drawing of **[11+13]**. The methyl groups of  $N(CH_3)_2$  are disordered. (Hydrogen atoms are omitted for clarity).

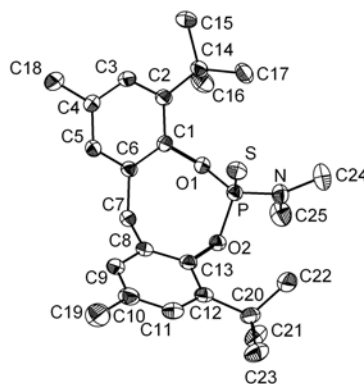

**Figure S3.** An ORTEP drawing of **14** (Hydrogen atoms are omitted for clarity).

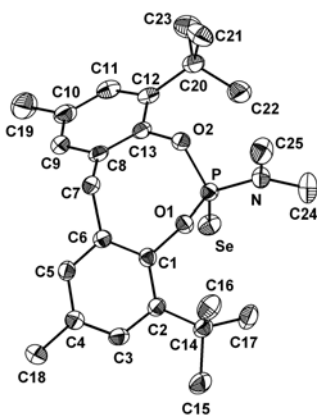

**Figure S4.** An ORTEP drawing of **15** (Hydrogen atoms are omitted for clarity).

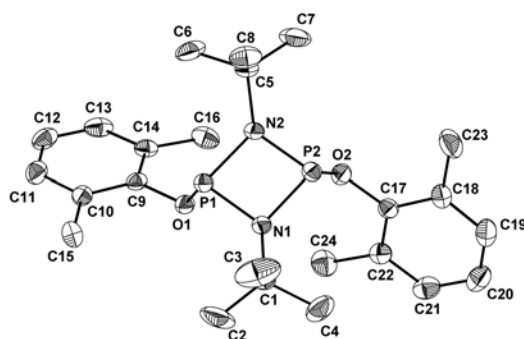

**Figure S5.** An ORTEP drawing of **12** (Hydrogen atoms are omitted for clarity)

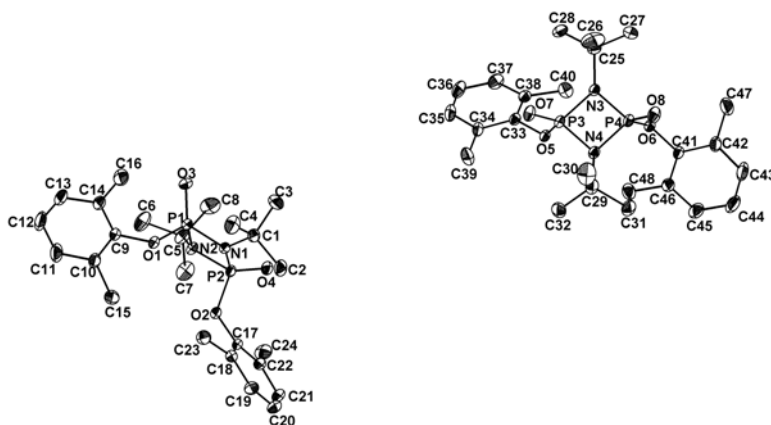

**Figure S6.** An ORTEP drawing of **16** (Hydrogen atoms are omitted for clarity) in the asymmetric unit.

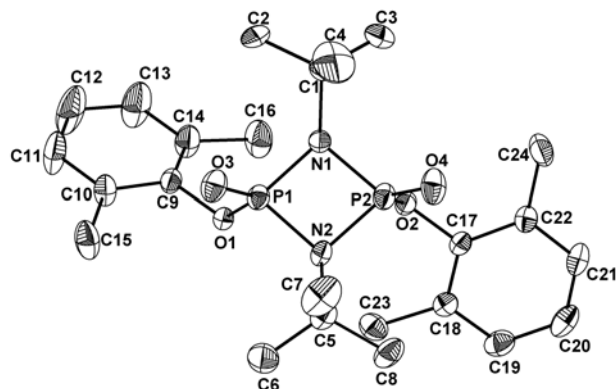

**Figure S7.** An ORTEP drawing of [16+17]**a** (Hydrogen atoms are omitted for clarity)

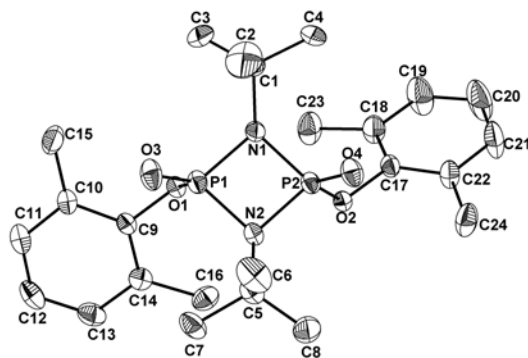

**Figure S8.** An ORTEP drawing of [16+17]**b** (Hydrogen atoms are omitted for clarity).

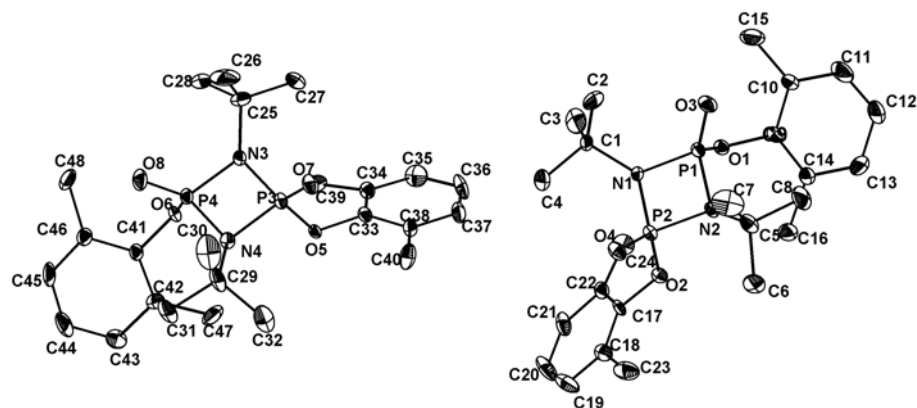

**Figure S9.** An ORTEP drawing of [16+17]**c** (Hydrogen atoms are omitted for clarity)

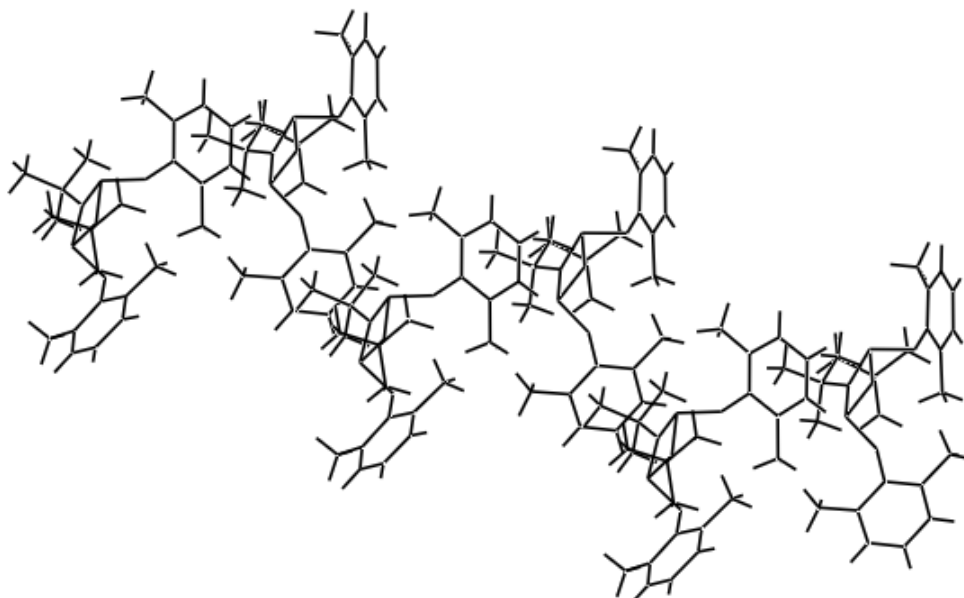

**Fig.S10.** Packing in **12**. No short contacts.

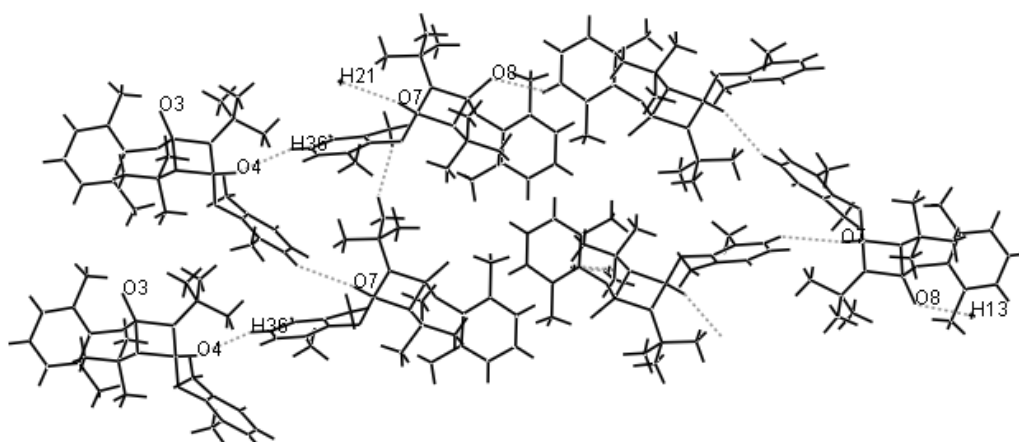

**Fig. S11.** Packing in **16**. Short contacts: C(21)-H(21)  $\cdots$  O(7)' [0.93, 2.68, 3.338(4)Å, 128.0° symmetry code: -1+x, y, z ]; C(13)-H(13)  $\cdots$  O(8)' [0.93, 2.69, 3.452(4)Å, 139.6° symmetry code: 1-x, 2-y, -1/2+z ]; C(36)-H(36)  $\cdots$  O(4)' [0.93, 2.62, 3.511(4)Å, 159.5° symmetry code: 1/2+x, 1-y, z]

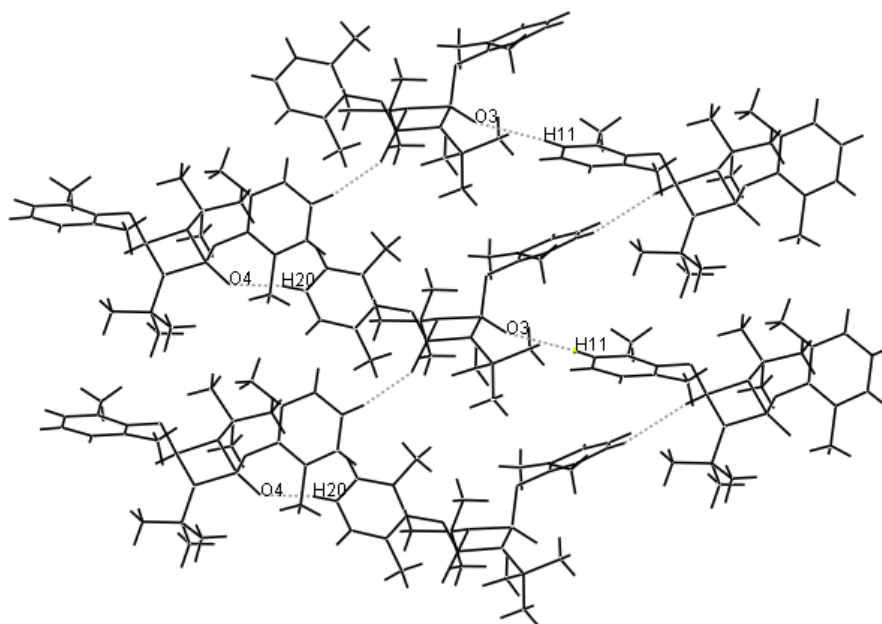

**Fig. S12.** Packing in **[16+17]a**. Short contacts. C(4)-H(4A)...O(1)' [0.96 2.68 3.487(5)Å 141.7° symmetry code: x, 1+y, z ]; C(11)-H(11)...O(3)' [0.93 2.70 3.479(5)Å 141.9° symmetry code: -x, -1/2+y, 1/2-z]; C(20)-H20...O(4)' [0.93 2.46 3.199(8)Å 136.8° symmetry code: 1-x, -1/2+y, 1/2-z ]

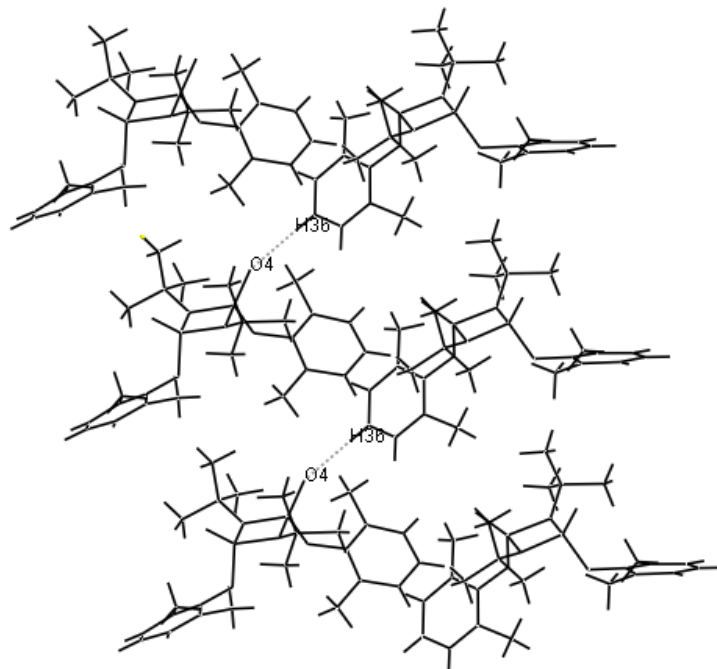

**Fig. S13.** Packing in **[16+17]b**. Short contacts: C(7)-H(7A)...O(1)' [0.96 2.69 3.447(11)Å 135.7° symmetry code: x, 1+y, z ]; C(36)-H(36)...O(4)' [0.93 2.62 3.515(10)Å 160.7° symmetry code: x, -1+y, z ]

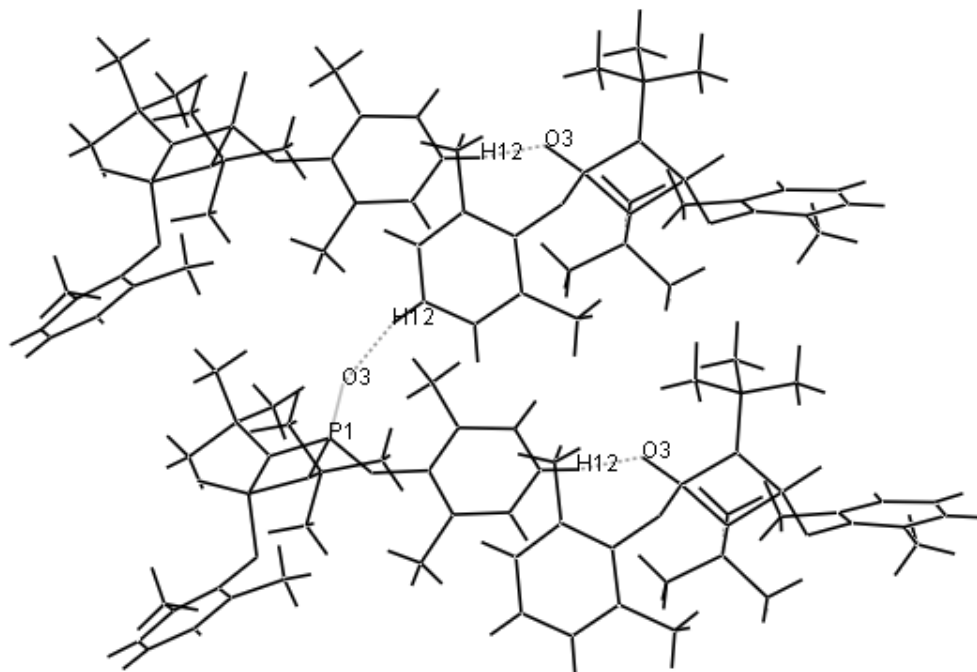

**Fig. S14.** Packing in **[16+17]c**. Short contact: C(12)-H(12)...O(3)' [0.93 2.47 3.217(5) Å, 137.6° symmetry code: -x, 0.5+y, 0.5-z].

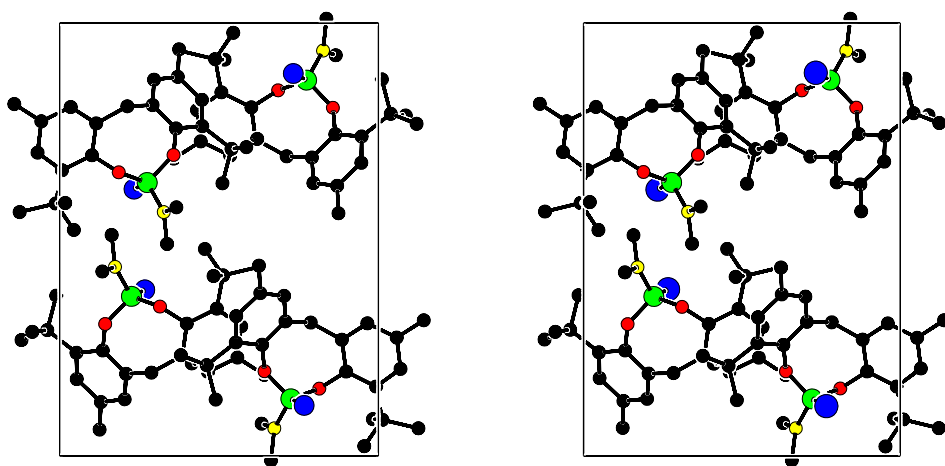

**Fig. S15.** PLATON drawing of packing in **13** (left) and **14** (right). Short contact in **14**: [C(24)-H(24C)...Se' [0.96, 2.93, 3.783(3)Å, 148.3°; symmetry code: -0.5+x, 1.5-y, 2-z].
